# Supplementary material for: Does Awareness of Malaysian Healthy Plate Associate with Adequate Fruit and Vegetable Intake among Malaysian Adults with Non-Communicable Diseases?
Source: MDPI journal article supplement (doi:10.3390/nu15245043), 2023-12-08
Supplement: s1 [file s1]

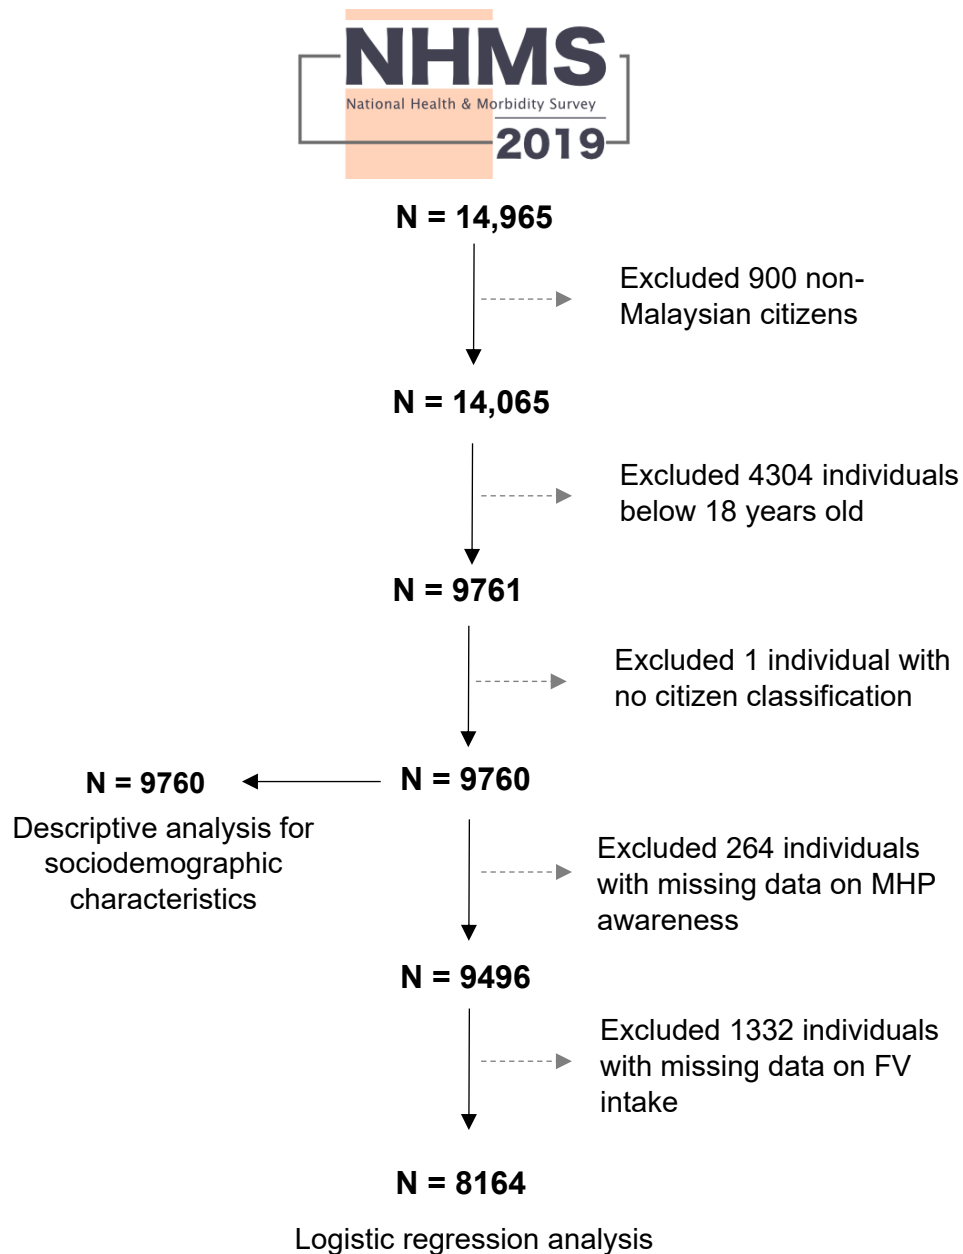

**Figure S1.** The inclusion and exclusion process of the NHMS respondents for data analysis.

**Table S1.** The prevalence of general obesity, abdominal obesity, diabetes mellitus, hypertension, and hypercholesterolemia among the Malaysian adults aged 18 years and above.

|                      | Estimated Population | Count (n) | Prevalence (%) | 95% CI <sup>1</sup> |
|----------------------|----------------------|-----------|----------------|---------------------|
| General obesity      | 11,800,453           | 6487      | 67.1           | 65.3-69.0           |
| Abdominal obesity    | 9,471,380            | 5429      | 50.4           | 48.5-52.3           |
| Diabetes mellitus    | 1,929,344            | 1365      | 10.3           | 9.5-11.1            |
| Hypertension         | 3,268,660            | 2327      | 17.4           | 16.2-18.6           |
| Hypercholesterolemia | 2,778,741            | 1960      | 14.8           | 13.8-15.8           |

<sup>1</sup>95% CI: 95% confidence interval

**Table S2.** The prevalence of MHP awareness among the Malaysian adults aged 18 years and above with general obesity, abdominal obesity, diabetes mellitus, hypertension, and hypercholesterolemia.

|                      | Prevalence (%) | 95% CI <sup>1</sup> |
|----------------------|----------------|---------------------|
| General obesity      |                |                     |
| Non-obese            | 20.7           | 18.0-23.6           |
| Obese                | 24.9           | 23.0-26.8           |
| Abdominal obesity    |                |                     |
| Non-obese            | 20.0           | 18.2-22.2           |
| Obese                | 25.7           | 23.7-27.9           |
| Diabetes mellitus    |                |                     |
| Yes                  | 22.9           | 20.0-26.2           |
| No                   | 22.4           | 20.8-24.1           |
| Hypertension         |                |                     |
| Yes                  | 20.0           | 17.5-22.6           |
| No                   | 23.0           | 21.3-24.8           |
| Hypercholesterolemia |                |                     |
| Yes                  | 22.9           | 20.3-25.7           |
| No                   | 22.4           | 20.8-24.1           |

<sup>1</sup>95% CI: 95% confidence interval

**Table S3.** The prevalence of adequacy of FV among the Malaysian adults aged 18 years and above with general obesity, abdominal obesity, diabetes mellitus, hypertension, and hypercholesterolemia.

|                      | Prevalence (%) | 95% CI <sup>1</sup> |
|----------------------|----------------|---------------------|
| General obesity      |                |                     |
| Non-obese            | 2.4            | 1.6-3.7             |
| Obese                | 2.3            | 1.8-2.9             |
| Abdominal obesity    |                |                     |
| Non-obese            | 2.2            | 1.6-3.1             |
| Obese                | 2.3            | 1.7-3.0             |
| Diabetes mellitus    |                |                     |
| Yes                  | 2.3            | 1.3-4.0             |
| No                   | 2.4            | 1.9-2.9             |
| Hypertension         |                |                     |
| Yes                  | 2.6            | 1.8-3.8             |
| No                   | 2.3            | 1.8-2.9             |
| Hypercholesterolemia |                |                     |
| Yes                  | 2.8            | 1.9-4.0             |
| No                   | 2.3            | 1.8-2.9             |

<sup>1</sup>95% CI: 95% confidence interval

**Table S4.** The association analysis between MHP awareness and adequate FV intake among the Malaysian adults aged 18 years and above.

| Characteristic        | aOR <sup>1</sup> | 95% CI <sup>1</sup> | p-value |
|-----------------------|------------------|---------------------|---------|
| MHP awareness         |                  |                     |         |
| Not aware             | 1.00             | —                   |         |
| Aware                 | 1.44             | 0.85-2.43           | 0.17    |
| Gender                |                  |                     |         |
| Male                  | 1.00             | —                   |         |
| Female                | 1.54             | 0.83-2.82           | 0.17    |
| Age group (years old) |                  |                     |         |
| 18-39                 | 1.00             | —                   |         |

|                          |      |           |      |
|--------------------------|------|-----------|------|
| 40-59                    | 0.72 | 0.41-1.27 | 0.26 |
| ≥ 60                     | 1.26 | 0.58-2.75 | 0.56 |
| Ethnicity                |      |           |      |
| Malay                    | 1.00 | —         |      |
| Chinese                  | 1.84 | 1.07-3.16 | 0.03 |
| Indian                   | 1.18 | 0.50-2.82 | 0.70 |
| Others                   | 1.01 | 0.47-2.15 | 0.99 |
| Residential area         |      |           |      |
| Urban                    | 1.00 | —         |      |
| Rural                    | 1.05 | 0.62-1.77 | 0.85 |
| Marital status           |      |           |      |
| Single                   | 1.00 | —         |      |
| Married                  | 1.30 | 0.72-2.36 | 0.38 |
| Widow/Widower/Divorcee   | 1.22 | 0.41-3.62 | 0.72 |
| Education level          |      |           |      |
| No formal education      | 1.00 | —         |      |
| Primary education        | 1.18 | 0.25-5.62 | 0.84 |
| Secondary education      | 1.63 | 0.32-8.35 | 0.56 |
| Tertiary education       | 1.46 | 0.25-8.63 | 0.67 |
| Occupation status        |      |           |      |
| Employed                 | 1.00 | —         |      |
| Unemployed               | 0.75 | 0.41-1.39 | 0.37 |
| Monthly household income |      |           |      |
| Bottom 40%               | 1.00 | —         |      |
| Middle 40%               | 1.03 | 0.63-1.69 | 0.89 |
| Top 20%                  | 1.72 | 0.84-3.50 | 0.14 |
| Smoking                  |      |           |      |
| Ever smoker              | 1.00 | —         |      |
| Never smoker             | 0.80 | 0.42-1.55 | 0.51 |

---

<sup>1</sup>aOR: adjusted odds ratio, 95% CI: 95% confidence interval

**Table S5.** The association analysis between MHP awareness and adequate FV intake among the Malaysian adults aged 18 years and above with general and abdominal obesity.

| Characteristic         | General obesity (n = 6487) |                     |         | Abdominal obesity (n = 5429) |                     |         |
|------------------------|----------------------------|---------------------|---------|------------------------------|---------------------|---------|
|                        | aOR <sup>1</sup>           | 95% CI <sup>1</sup> | p-value | aOR <sup>1</sup>             | 95% CI <sup>1</sup> | p-value |
| MHP awareness          |                            |                     |         |                              |                     |         |
| Not aware              | 1.00                       | —                   |         | 1.00                         | —                   |         |
| Aware                  | 1.59                       | 0.91-2.75           | 0.10    | 1.86                         | 1.05-3.29           | 0.03    |
| Gender                 |                            |                     |         |                              |                     |         |
| Male                   | 1.00                       | —                   |         | 1.00                         | —                   |         |
| Female                 | 1.54                       | 0.69-3.40           | 0.29    | 1.40                         | 0.57-3.43           | 0.47    |
| Age group (years old)  |                            |                     |         |                              |                     |         |
| 18-39                  | 1.00                       | —                   |         | 1.00                         | —                   |         |
| 40-59                  | 0.60                       | 0.28-1.32           | 0.20    | 0.39                         | 0.16-0.96           | 0.04    |
| ≥ 60                   | 1.39                       | 0.53-3.62           | 0.50    | 1.34                         | 0.47-3.86           | 0.58    |
| Ethnicity              |                            |                     |         |                              |                     |         |
| Malay                  | 1.00                       | —                   |         | 1.00                         | —                   |         |
| Chinese                | 1.41                       | 0.64-3.12           | 0.39    | 2.15                         | 0.98-4.71           | 0.06    |
| Indian                 | 1.18                       | 0.48-2.90           | 0.71    | 1.40                         | 0.54-3.59           | 0.49    |
| Others                 | 1.03                       | 0.45-2.37           | 0.94    | 1.20                         | 0.46-3.14           | 0.71    |
| Residential area       |                            |                     |         |                              |                     |         |
| Urban                  | 1.00                       | —                   |         | 1.00                         | —                   |         |
| Rural                  | 1.07                       | 0.58-1.98           | 0.83    | 1.07                         | 0.52-2.23           | 0.85    |
| Marital status         |                            |                     |         |                              |                     |         |
| Single                 | 1.00                       | —                   |         | 1.00                         | —                   |         |
| Married                | 1.06                       | 0.49-2.28           | 0.88    | 0.84                         | 0.36-1.96           | 0.69    |
| Widow/Widower/Divorcee | 0.88                       | 0.26-2.94           | 0.83    | 0.65                         | 0.18-2.32           | 0.50    |
| Education level        |                            |                     |         |                              |                     |         |
| No formal education    | 1.00                       | —                   |         | 1.00                         | —                   |         |
| Primary education      | 1.01                       | 0.14-7.46           | >0.99   | 1.61                         | 0.21-12.61          | 0.65    |
| Secondary education    | 1.75                       | 0.22-13.84          | 0.59    | 1.97                         | 0.22-17.96          | 0.55    |
| Tertiary education     | 1.15                       | 0.11-11.60          | 0.90    | 1.83                         | 0.17-20.30          | 0.62    |

|                          |      |           |      |      |           |      |
|--------------------------|------|-----------|------|------|-----------|------|
| Occupation status        |      |           |      |      |           |      |
| Employed                 | 1.00 | —         |      | 1.00 | —         |      |
| Unemployed               | 0.56 | 0.30-1.02 | 0.06 | 0.47 | 0.24-0.92 | 0.03 |
| Monthly household income |      |           |      |      |           |      |
| Bottom 40%               | 1.00 | —         |      | 1.00 | —         |      |
| Middle 40%               | 0.96 | 0.51-1.80 | 0.89 | 1.34 | 0.70-2.59 | 0.38 |
| Top 20%                  | 1.94 | 0.82-4.60 | 0.13 | 1.43 | 0.53-3.83 | 0.48 |
| Smoking                  |      |           |      |      |           |      |
| Ever smoker              | 1.00 | —         |      | 1.00 | —         |      |
| Never smoker             | 0.63 | 0.30-1.35 | 0.23 | 1.03 | 0.36-2.90 | 0.96 |
| Diabetes mellitus        |      |           |      |      |           |      |
| No                       | 1.00 | —         |      | 1.00 | —         |      |
| Yes                      | 0.98 | 0.49-2.00 | 0.97 | 1.01 | 0.47-2.16 | 0.99 |
| Hypertension             |      |           |      |      |           |      |
| No                       | 1.00 | —         |      | 1.00 | —         |      |
| Yes                      | 1.54 | 0.76-3.13 | 0.23 | 2.38 | 1.11-5.08 | 0.03 |
| Hypercholesterolemia     |      |           |      |      |           |      |
| No                       | 1.00 | —         |      | 1.00 | —         |      |
| Yes                      | 1.37 | 0.64-2.95 | 0.41 | 1.15 | 0.52-2.55 | 0.73 |
| Abdominal obesity        |      |           |      |      |           |      |
| Non-obese                | 1.00 | —         |      |      |           |      |
| Obese                    | 0.98 | 0.53-1.78 | 0.94 |      |           |      |
| General obesity          |      |           |      |      |           |      |
| Non-obese                |      |           |      | 1.00 | —         |      |
| Obese                    |      |           |      | 0.89 | 0.37-2.15 | 0.80 |

<sup>1</sup>aOR: adjusted odds ratio, 95% CI: 95% confidence interval. The model predicted values for general obesity and abdominal obesity were 97.6% (AUC= 0.60 (95% CI: 0.54-0.65, p < 0.001) and 97.6% (AUC=0.64, 95% CI : 0.58-0.70, p < 0.0001), respectively.

**Table S6.** The association analysis between MHP awareness and adequate FV intake among the Malaysian adults aged 18 years and above with diabetes mellitus, hypertension and hypercholesterolemia.

| Characteristic        | Diabetes mellitus (n = 1365) |                     |         | Hypertension (n = 2327) |                     |         | Hypercholesterolemia (n = 1960) |                     |         |
|-----------------------|------------------------------|---------------------|---------|-------------------------|---------------------|---------|---------------------------------|---------------------|---------|
|                       | aOR <sup>1</sup>             | 95% CI <sup>1</sup> | p-value | aOR <sup>1</sup>        | 95% CI <sup>1</sup> | p-value | aOR <sup>1</sup>                | 95% CI <sup>1</sup> | p-value |
| MHP awareness         |                              |                     |         |                         |                     |         |                                 |                     |         |
| Not aware             | 1.00                         | —                   |         | 1.00                    | —                   |         | 1.00                            | —                   |         |
| Aware                 | 6.88                         | 2.13-22.18          | <0.01   | 4.39                    | 1.96-9.83           | <0.001  | 4.16                            | 1.48-11.72          | <0.01   |
| Gender                |                              |                     |         |                         |                     |         |                                 |                     |         |
| Male                  | 1.00                         | —                   |         | 1.00                    | —                   |         | 1.00                            | —                   |         |
| Female                | 0.79                         | 0.12-5.15           | 0.81    | 0.89                    | 0.27-2.91           | 0.84    | 0.78                            | 0.23-2.58           | 0.68    |
| Age group (years old) |                              |                     |         |                         |                     |         |                                 |                     |         |
| 18-39                 | 1.00                         | —                   |         | 1.00                    | —                   |         | 1.00                            | —                   |         |
| 40-59                 | 0.14                         | 0.03-0.77           | 0.02    | 0.23                    | 0.05-1.13           | 0.07    | 0.56                            | 0.11-2.93           | 0.49    |
| ≥ 60                  | 0.86                         | 0.12-6.44           | 0.89    | 1.01                    | 0.22-4.66           | 0.99    | 1.17                            | 0.26-5.37           | 0.84    |
| Ethnicity             |                              |                     |         |                         |                     |         |                                 |                     |         |
| Malay                 | 1.00                         | —                   |         | 1.00                    | —                   |         | 1.00                            | —                   |         |
| Chinese               | 2.88                         | 0.50-16.68          | 0.24    | 2.97                    | 1.09-8.14           | 0.03    | 3.32                            | 1.32-8.33           | 0.01    |
| Indian                | 1.72                         | 0.30-9.77           | 0.54    | 1.89                    | 0.52-6.93           | 0.33    | 2.70                            | 0.71-10.30          | 0.15    |
| Others                | 1.72                         | 0.25-11.87          | 0.58    | 0.32                    | 0.05-2.19           | 0.24    | 0.16                            | 0.02-1.31           | 0.09    |
| Residential area      |                              |                     |         |                         |                     |         |                                 |                     |         |
| Urban                 | 1.00                         | —                   |         | 1.00                    | —                   |         | 1.00                            | —                   |         |

[illegible]

| Characteristic       | Diabetes mellitus (n = 1365) |                     |         | Hypertension (n = 2327) |                     |         | Hypercholesterolemia (n = 1960) |                     |         |
|----------------------|------------------------------|---------------------|---------|-------------------------|---------------------|---------|---------------------------------|---------------------|---------|
|                      | aOR <sup>1</sup>             | 95% CI <sup>1</sup> | p-value | aOR <sup>1</sup>        | 95% CI <sup>1</sup> | p-value | aOR <sup>1</sup>                | 95% CI <sup>1</sup> | p-value |
| Ever smoker          | 1.00                         | —                   |         | 1.00                    | —                   |         | 1.00                            | —                   |         |
| Never smoker         | 0.55                         | 0.12-2.46           | 0.43    | 0.83                    | 0.25-2.69           | 0.75    | 0.61                            | 0.20-1.88           | 0.39    |
| Hypertension         |                              |                     |         |                         |                     |         |                                 |                     |         |
| No                   | 1.00                         | —                   |         | 1.00                    | —                   |         | 1.00                            | —                   |         |
| Yes                  | 12.66                        | 1.06-150.64         | 0.05    |                         | NA                  |         | 1.45                            | 0.50-4.21           | 0.49    |
| Hypercholesterolemia |                              |                     |         |                         |                     |         |                                 |                     |         |
| No                   | 1.00                         | —                   |         | 1.00                    | —                   |         | 1.00                            | —                   |         |
| Yes                  | 0.99                         | 0.25-3.91           | 0.99    | 1.35                    | 0.46-3.96           | 0.59    |                                 | NA                  |         |
| Diabetes mellitus    |                              |                     |         |                         |                     |         |                                 |                     |         |
| No                   |                              | NA                  |         | —                       | —                   |         | —                               | —                   |         |
| Yes                  |                              |                     |         | 1.32                    | 0.53-3.33           | 0.55    | 0.85                            | 0.39-1.83           | 0.67    |

<sup>1</sup>aOR: adjusted odds ratio, 95% CI: 95% confidence interval. The model predicted value for diabetes mellitus, hypertension and hypercholesterolemia were 97.7% (area under curve (AUC): 0.65, 95% CI : 0.52–0.78, p = 0.03), 97.4% (area under curve (AUC): 0.68, 95% CI : 0.59–0.76, p = 0.04), and 97.1% (area under curve (AUC): 0.58, 95% CI : 0.48–0.68, p = 0.11)
